# Supplementary material for: Weighted Gene Co-Expression Network Analysis Reveals a New Survival Model for Prognostic Prediction in Ewing Sarcoma
Source: Research Square preprint supplement (doi:10.21203/rs.3.rs-470100/v1), 2021-05-07
Supplement: Supplementary file 1 [file c12d16db670ec18ac23927ab.csv]

ID	pValue_log
NR1H3	2.53E-07
TOP1	3.57E-07
NOP2	5.54E-07
DDB2	5.56E-07
PTPN22	6.13E-07
GOT1L1	8.94E-07
ASPM	2.47E-06
PTTG1	2.57E-06
CDC45	2.58E-06
XPOT	2.75E-06
CDCA7	3.00E-06
LRRC8D	3.91E-06
DGAT1	5.08E-06
GLB1L2	5.18E-06
EMILIN1	5.40E-06
TTK	7.42E-06
ENPP1	1.08E-05
SLC16A1	1.17E-05
NXT1	1.58E-05
CDCA3	1.73E-05
MIS18A	1.86E-05
RACGAP1	1.93E-05
NEK2	2.15E-05
P4HTM	2.21E-05
CENPW	2.31E-05
ANXA1	2.51E-05
THBS3	2.62E-05
PSMG3	2.70E-05
UHRF1	2.71E-05
FERMT3	2.76E-05
FOXM1	2.81E-05
PUS1	3.29E-05
SPTAN1	3.49E-05
AURKA	3.55E-05
KIF14	3.58E-05
NUF2	3.60E-05
IGFBP4	4.05E-05
RBBP8	4.06E-05
RAD51AP1	4.16E-05
PHGDH	4.28E-05
SQLE	5.32E-05
GOLGB1	5.39E-05
YWHAG	5.58E-05
PMM2	5.99E-05
CCNB1	6.98E-05
SSB	7.83E-05
SLC16A4	8.06E-05
TBPL1	8.12E-05
CMSS1	9.67E-05
DDRGK1	0.000105613
CDC7	0.000119466
TOB1	0.000152288
FZD2	0.000156649
UBE2C	0.000156778
ZMAT3	0.000161126
PCDH17	0.000167959
KIF18B	0.000175813
RCC2	0.000182757
PLSCR4	0.000184017
RPS21	0.000212287
CENPF	0.000213206
MCM6	0.00023105
GSTP1	0.000256272
SLC37A3	0.000283382
CKS2	0.000289663
KIF2C	0.000291577
KLHL23	0.000314887
INTS8	0.000317188
CCDC59	0.000317265
GINS1	0.000424418
KIF20A	0.000428229
RNF135	0.000431118
PAK1IP1	0.000439457
G0S2	0.000448124
NCAPD2	0.000461626
HILPDA	0.000464039
NUSAP1	0.00046982
NDUFB9	0.000471446
ZC3HAV1	0.000474491
TMEM159	0.000484522
SF3B4	0.000488626
PSRC1	0.000490591
E2F3	0.000501918
CTPS1	0.000538544
MCM7	0.000547057
ATAD2	0.000560449
REEP4	0.00056404
NUDT1	0.000569456
DLGAP5	0.000579336
ZMYND19	0.000580871
ARL6IP1	0.000649051
FOXO6	0.000733021
ABRACL	0.000761974
PUS7	0.000778032
ITM2C	0.000788683
RBM10	0.000791275
PRAME	0.000820565
PROS1	0.000839056
TULP3	0.000867835
F8	0.0008963
PHYKPL	0.000949439
HNRNPAB	0.000996565
NCAPG	0.001008567
PMAIP1	0.001014882
SLC26A11	0.001115743
COX6A1	0.001118165
ADD3	0.001136741
SPAG5	0.001141214
STAU1	0.001195037
CCT6A	0.001235004
TSTA3	0.001259168
EIF3B	0.001290956
BTG3	0.001361293
SND1	0.001378085
C1orf112	0.001405848
BUB1B	0.001417793
TPX2	0.001419779
SNRPF	0.001488414
DDX17	0.001548461
NOP58	0.001566541
CDK4	0.00157302
POLD1	0.001630315
YTHDF2	0.001649204
APOE	0.001682905
KIF4A	0.001787288
CPT1C	0.001820696
NDC80	0.002003785
TUBB6	0.002070653
CWC27	0.002118005
MAPKAPK3	0.002226653
SECISBP2L	0.002244904
NCOA2	0.002378735
DEPDC1B	0.002614913
AHCTF1	0.00263808
SSPN	0.002703484
TBC1D5	0.002729204
SPNS1	0.002729477
HSPE1	0.002730061
ACADVL	0.00282017
CDC25B	0.002832382
MCM3	0.002898
LBR	0.002918503
FJX1	0.003022584
LMNB1	0.003118112
FAM117A	0.003222865
TACC3	0.003313322
OCIAD2	0.003402705
CEP85	0.003515541
DNMT1	0.00354592
SUOX	0.003644012
PDIA4	0.003796538
PTMA	0.003837967
TUBB4B	0.003854887
WDR34	0.004058785
MXRA8	0.004119382
CSE1L	0.004130455
EFNA4	0.004397191
EIF4EBP1	0.004538056
COX14	0.004957158
MPHOSPH10	0.005079608
TXNIP	0.005079827
TTI1	0.00513555
CCNT1	0.005936598
MAP1LC3B	0.005993005
ELF1	0.006022308
TGIF2	0.006077729
NME4	0.006159973
PDIA6	0.006532165
SLC19A2	0.006555665
LPCAT1	0.007124553
SNRPB	0.007491343
SNRPA1	0.007523843
NME1	0.007566489
P2RX5	0.007721853
KRT10	0.007911948
CDCA7L	0.007915871
CYP27C1	0.008012482
TRIP13	0.008124921
MCM2	0.008271391
PLEKHO1	0.008376496
DDX39A	0.00877818
DDX23	0.00899293
CBX7	0.009332708
DBF4	0.009492444
WDR18	0.009670904
PCNA	0.009941894
COX7A1	0.010110161
ORC6	0.010398653
VARS2	0.010455291
ZNF678	0.010568971
FAM83D	0.010588025
HELLS	0.010855603
DTL	0.011403996
TDG	0.011628756
DDIAS	0.011858837
TAF2	0.012029522
EIF6	0.012165563
KPNA2	0.012186597
CDC20	0.012306109
TRIT1	0.01243033
HSPB2	0.012649057
ID4	0.012801084
FEN1	0.013082459
TCF25	0.013179404
WSB1	0.013446586
TTLL12	0.013626671
RNASEH2A	0.013854316
E2F8	0.014000789
WBP1L	0.014227091
CENPK	0.014246898
NBPF20	0.014755261
PRRC2C	0.015651939
BZW2	0.015660005
HMGB2	0.016098167
ZNF281	0.016416021
ANP32B	0.016478521
ADIPOQ	0.016742711
HDAC1	0.017334514
OSBPL6	0.017599523
CLPTM1L	0.018034819
HMGN2	0.018751408
SMYD3	0.018822905
TPBG	0.019889713
RAN	0.020329149
RBM38	0.020649157
SCAF11	0.020655661
SLC5A3	0.020909586
ACAT2	0.021546173
C4orf48	0.021959054
LSM10	0.022436342
ZWINT	0.022766177
CEP55	0.022918598
RP9	0.022951279
GFRA2	0.02299381
HNRNPR	0.023273443
ACTL6A	0.023334825
SLC39A4	0.02391565
ARF3	0.024228667
LSM7	0.024533995
NDRG1	0.025162935
SESN1	0.02551652
DNAJB11	0.025785144
ACSL3	0.026068761
SLC25A32	0.026241131
PRAC1	0.026331249
NEUROD6	0.026525147
SNRPG	0.027306208
ATIC	0.027509978
PTPRG	0.027517858
PSME4	0.027574392
RAE1	0.027819857
ZNF124	0.029682163
NUDCD1	0.031000062
NDC1	0.031004962
LMNB2	0.031330314
SH3PXD2A	0.031606863
PDHA1	0.031815287
PRC1	0.032053366
DDX55	0.032990209
CNRIP1	0.033050439
C5orf34	0.033084805
TOP2A	0.034124232
IGFBP2	0.034310916
ROBO1	0.034598552
GGH	0.034919735
TNFAIP6	0.035238972
MTX1	0.035383726
LSG1	0.036670477
TRMT6	0.036757495
SAC3D1	0.036885796
STMN1	0.037025082
SSRP1	0.037122872
SART3	0.037447357
RRM2	0.037956342
XPO7	0.03960686
MANF	0.040046773
STIL	0.042360555
SNRNP25	0.042438558
SNRPD1	0.042494922
CCNL1	0.043378557
WRN	0.044106156
RPL39L	0.044648044
POGK	0.045364886
CCDC3	0.045903362
POU3F2	0.047280062
ACOT7	0.047707251
NCKAP1L	0.047797789
DNAJB6	0.048177867
CENPE	0.04919724
ANLN	0.04980914
USP1	0.050239912
ZNF195	0.050542454
KPNA3	0.051347408
TERF1	0.051920941
VANGL2	0.051945393
YARS2	0.0523306
FAM98B	0.052518077
PLK1	0.053593298
CANT1	0.060530843
GMNN	0.061392376
FOS	0.061920679
CAMK2N1	0.062004296
VIM	0.064547048
NDUFAF5	0.067356515
SERINC3	0.069112578
MARCKSL1	0.069586709
SHCBP1	0.075817929
COX5A	0.076062111
TENM2	0.076628398
PBK	0.076907683
TMEM70	0.077106629
MPLKIP	0.078353745
PLEKHA4	0.078501414
NUP107	0.080169399
SKA2	0.080187015
KIF23	0.080622174
KIF15	0.080800688
MCM5	0.080827293
MRPL33	0.081435231
KLHDC3	0.081981074
MKI67	0.082328558
ENDOG	0.082988412
HMGXB4	0.083528421
MAK16	0.086616269
RHNO1	0.086908806
SPDL1	0.087703931
UQCRQ	0.08884878
SUMF1	0.089440331
MBTPS1	0.095247966
APOO	0.096142093
MEA1	0.096535976
PPRC1	0.097407157
NCAPG2	0.097484083
BID	0.101454137
MSMO1	0.102699063
FAM91A1	0.102734589
RBBP4	0.102828601
TRIM59	0.103898104
ZNF232	0.105973397
CWC22	0.106247356
UBE2S	0.107948924
FANCG	0.110471149
CMIP	0.111166398
NCAPD3	0.1117119
PHF6	0.112434636
KPNB1	0.113536409
TGS1	0.11432523
MTUS1	0.115559401
TUBA1B	0.116607454
RFC4	0.117628043
SPC25	0.118251644
ORMDL2	0.119617925
FBXO5	0.122859575
THOC2	0.125631692
PCBP2	0.126626013
PIH1D1	0.127099467
POM121C	0.127482926
MELK	0.128236433
CISD1	0.128677355
CDKN1A	0.128767663
SKI	0.13015277
GAS2L3	0.133194975
PFAS	0.137484104
ID1	0.139557892
POLR2H	0.140604557
TMEM97	0.1443788
TXN	0.14594814
DCLRE1B	0.146707164
CCDC137	0.15258174
MND1	0.153297899
RNF138	0.155161684
CAD	0.157994175
TPD52L2	0.158330304
ZNF580	0.162667925
NDUFB3	0.164558121
PLAGL1	0.171457727
SULT1A1	0.172394442
NDUFA1	0.173155283
HNRNPUL1	0.174496777
PREX1	0.175317097
GAR1	0.176508749
POLR2I	0.177212387
CDK1	0.182964693
RFC2	0.183934082
GOLGA8A	0.188905521
AKAP1	0.189460292
HDDC2	0.190511786
RFC5	0.193551135
LANCL2	0.193736422
B3GALT6	0.195586106
CDK5	0.195822556
COX6C	0.196267827
DHX30	0.198921146
PSAT1	0.199129948
PAICS	0.199161407
FANCI	0.206000829
TPI1	0.208944663
FGF13	0.209259644
HNRNPA3	0.209501778
PPP4C	0.210811048
FBXO32	0.214535985
KNTC1	0.215496567
SDHA	0.216061436
MLLT11	0.217861024
ARMC1	0.22023739
RMI1	0.22138933
MFHAS1	0.229426874
MEIS1	0.233823427
CPSF3	0.233936195
NASP	0.234974996
PINK1	0.243846343
KIF11	0.245191994
SLC25A5	0.247010961
AIMP2	0.25043063
PHF19	0.254739848
FLVCR1	0.254953974
PPP1R16A	0.256307007
XPO1	0.264466684
KIF18A	0.272017843
NABP1	0.277038544
C8orf76	0.277994586
JUNB	0.280005041
ECT2	0.281369637
NDUFB2	0.287140249
WDR75	0.288255615
SMC2	0.288318361
GPAA1	0.291427845
MIS18BP1	0.292005259
TTC13	0.296769585
DHCR24	0.30804028
CCNA2	0.31112851
C12orf43	0.327282936
GAPDH	0.337024794
HMMR	0.343934808
TSHZ1	0.352623202
NOL7	0.352676306
PRELID1	0.3534661
DUT	0.357064474
TSHZ3	0.359427732
TUBA1C	0.369868385
LRP1B	0.370422761
VPS33B	0.379300904
SFXN1	0.38133217
EBP	0.390257501
NEDD1	0.394315007
ZWILCH	0.396001777
PPIH	0.403113338
GNL2	0.403695101
ALCAM	0.415450966
RALA	0.417689156
APMAP	0.425121852
CDKN3	0.426525406
CBX3	0.431228758
NRAS	0.432398391
PPIF	0.432686001
OTUD6B	0.4334472
STARD3NL	0.435264044
NFIC	0.439964774
NDUFA12	0.454143539
IL1RAP	0.457263467
TUBG1	0.463459419
DENND2C	0.503101793
DNAJC1	0.507642681
CASP3	0.509795292
ARPC3	0.532206298
DCAF13	0.535895024
TYMS	0.558515537
MORF4L2	0.572173251
ZNHIT1	0.582411365
DAZAP1	0.618085277
FARSB	0.644893531
ILF3	0.654766918
TOPBP1	0.661617104
SNRPA	0.665566786
DPAGT1	0.690701642
IDH1	0.704878961
CENPU	0.716559605
MDN1	0.759391266
MASTL	0.765098636
VPS13A	0.773176998
TALDO1	0.776140733
TMEM33	0.784037716
GALNT7	0.785869803
HENMT1	0.791731023
ZNF367	0.794029234
CDC6	0.796741066
FANCL	0.797150042
RAD54B	0.797797817
RPA3	0.803778614
FASTKD5	0.805543364
CCDC43	0.806852137
NFAT5	0.826490036
DPP3	0.826714082
SMC4	0.863240286
BRIP1	0.912770252
LONRF2	0.922120877
MORC2	0.934509094
STXBP1	0.95463973
IER2	0.967128128
RPN1	0.982231394
